# Supplementary material for: An Engineering Approach to Extending Lifespan in C. elegans
Source: PLoS Genet. 2012 Jun 21;8(6):e1002780. doi: 10.1371/journal.pgen.1002780 (PMC3380832; doi:10.1371/journal.pgen.1002780)
Supplement: Table S1 — Genes tested in this study. (DOC) [file pgen.1002780.s003.doc]

**Table S1**. Genes tested in this study.

| **Gene Name** | **Role** |
| --- | --- |
| *hsf-1a,d, daf-16a*  *aakg-2(sta2)a,d*  *sod-1a,d* | Regulates stress response  Senses ATP : AMP ratio  Reduces O2- |
| *uba-1a*  *lmp-2a,d* | Increases protein turn-over  Induces chaperone-mediated autophagy |
| *sod1b,d*  *foxo3ab*  *msrac*  *psmb1b*  *aldh2c* | Reduces O2-  Regulates stress response  Repairs oxidized proteins  Increases protein turn-over  Oxidizes aldehydes |
| *ucp-4a, ucp2b,d*  *lys-1a, lyzb,d*  *lipcb* | Reduces proton gradient  Lyses bacterial cell walls  Reduces fat storage |

a*C. elegans*; b*Danio rerio*; c*Homo sapiens*; dtransgene extends lifespan

Table S1

Genes tested in this study and their corresponding roles.
